# Supplementary material
Source: Frontiers journal article supplement (https://www.frontiersin.org/articles/307398)
Supplement: Data_Sheet_1.PDF [file Data_Sheet_1.PDF]

## **Supporting Information**

### **Influence of the chemical structure on odor qualities and odor thresholds of halogenated guaiacol-derived odorants**

Florian Juhlke<sup>a</sup>, Katja Lorber<sup>a,b</sup>, Maria Wagenstaller<sup>b</sup>, Andrea Buettner<sup>a,b\*</sup>

<sup>a</sup>Professorship of Aroma Research, Department of Chemistry and Pharmacy, Emil Fischer Center, Friedrich-Alexander-Universität Erlangen-Nürnberg (FAU), Henkestr. 9, 91054 Erlangen, Germany

<sup>b</sup>Department of Sensory Analytics, Fraunhofer Institute for Process Engineering and Packaging IVV, Giggenhauser Str. 35, 85354 Freising, Germany

\*Correspondence:

Andrea Buettner

[andrea.buettner@ivv.fraunhofer.de](mailto:andrea.buettner@ivv.fraunhofer.de)

## Synthesis

### 3-Chloro-2-methoxybenzaldehyde, Figure 1 (Steen et al., 2009)

NaOH pellets (763 mg, 19 mmol, 3.5eq) were dissolved in H<sub>2</sub>O (20 mL). Tetrabutylammonium hydroxide solution (TBAH, 24 mL, ~1.5 M or ~40% in H<sub>2</sub>O, ~36 mmol, ~ 6 eq.), CH<sub>2</sub>Cl<sub>2</sub> (40 mL), and 3-chlorosalicylaldehyde (887 mg, 5.66 mmol, 1eq) were added. Iodomethane (1.8 mL, 4.1 g, 28.9 mmol, 5 eq.) was added dropwise, and the reaction mixture was stirred for 22 h at room temperature afterwards. The aqueous and organic layers were separated, and the aqueous layer was extracted three times with 50 mL CH<sub>2</sub>Cl<sub>2</sub>. The combined organic layers were dried over Na<sub>2</sub>SO<sub>4</sub>, and the solvent was removed under reduced pressure. The residue was purified by column chromatography (Silica gel; n-hexane/ethyl acetate = 5:1).

### 3-Chloroguaiacol (3-chloro-2-methoxyphenol, entry 1), Figure 1 (Steen et al., 2009)

Trifluoroacetic anhydride (3 mL, 4.5 g, 21.58 mmol, 8 eq.) was added dropwise to an ice-cold solution of H<sub>2</sub>O<sub>2</sub> solution (493 mg, 30 wt.% in H<sub>2</sub>O, 4.35 mmol, 1.6 eq.) and CH<sub>2</sub>Cl<sub>2</sub> (2 mL), and stirred for 1 h at 0 °C. 3-Chloro-2-methoxybenzaldehyde (480 mg, 3.03 mmol, 1 eq.) and potassium dihydrogenphosphate (8 g, 58.78 mmol, 22 eq.) were dissolved in CH<sub>2</sub>Cl<sub>2</sub> (20 mL) and cooled to 0 °C. The peroxide-solution was slowly added dropwise to the prepared 3-chloro-methoxybenzaldehyde solution. The reaction mixture was stirred for 2 h at 0°C. To stop the reaction, 10 mL brine and 10 mL 20% sodium bisulfite solution were added. After separation, the aqueous layer was extracted three times with 30 mL CH<sub>2</sub>Cl<sub>2</sub>. The combined organic layers were dried over Na<sub>2</sub>SO<sub>4</sub>, and the solvent was removed under reduced pressure. The residue was taken up in 15 mL MeOH, one drop HCl conc. was added, and the mixture left standing for 15 h at room temperature. After removal of the solvent, the crude product was purified by column chromatography (Silica gel; n-hexane/ethyl acetate = 4:1).

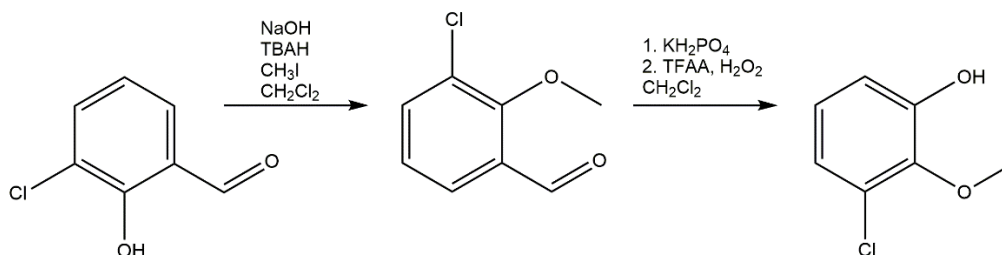

**Figure S1:** General synthetic route leading to 3-chloroguaiacol (entry 1)

### 3-Bromo-2-methoxybenzaldehyde, Figure 2 (Erickson et al., 2012)

NaOH pellets (595 mg, 14.88 mmol, 3.5 eq.) were dissolved in H<sub>2</sub>O (20 mL). Tetrabutylammonium hydroxide solution (18 mL, ~1.5 M or ~40% in H<sub>2</sub>O, ~27 mmol, ~ 6 eq.), CH<sub>2</sub>Cl<sub>2</sub> (40 mL), and 3-bromosalicylaldehyde (888 mg, 4.42 mmol, 1 eq.) were added. Iodomethane (1.14 mL, 3.19 g, 22.49 mmol, 5 eq.) was added dropwise, and the reaction mixture was stirred for 18 h at room temperature afterwards. The aqueous and organic layers were separated, and the aqueous layer was extracted three times with 50 mL CH<sub>2</sub>Cl<sub>2</sub>. The combined organic layers were dried over Na<sub>2</sub>SO<sub>4</sub>, and the solvent was removed under reduced pressure. The residue was purified by column chromatography (Silica gel; n-hexane/ethyl acetate = 5:1).

### 3-Bromoguaiacol (3-bromo-2-methoxyphenol, entry 7), Figure 2 (Erickson et al., 2012)

Trifluoroacetic anhydride (3.8 mL, 5.74 g, 27.33 mmol, 8 eq.) was added dropwise to an ice-cold solution of H<sub>2</sub>O<sub>2</sub> solution (606 mg, 30 wt% in H<sub>2</sub>O, 5.35 mmol, 1.6 eq.) and CH<sub>2</sub>Cl<sub>2</sub> (5 mL), and stirred for 1 h at 0 °C. 3-Bromo-2-methoxybenzaldehyde (721 mg, 3.35 mmol, 1 eq.) and potassium dihydrogenphosphate (10 g, 73.48 mmol, 22 eq.) were dissolved in 40 mL CH<sub>2</sub>Cl<sub>2</sub> and cooled to 0 °C. The peroxide-solution was slowly added dropwise to the prepared 3-bromo-methoxybenzaldehyde solution. The reaction mixture was stirred for 2 h at 0°C. To stop the reaction, 10 mL brine and 10 mL 20% sodium bisulfite solution were added. After separation, the aqueous layer was extracted three times with 30 mL CH<sub>2</sub>Cl<sub>2</sub>. The combined organic layers were dried over Na<sub>2</sub>SO<sub>4</sub>, and the solvent was removed under reduced pressure. The residue was taken up in 20 mL MeOH, one drop HCl conc. was added, and the mixture stirred for 15 h at room temperature. After removal of the solvent, the crude product was purified by column chromatography (Silica gel; n-hexane/ethyl acetate = 4:1).

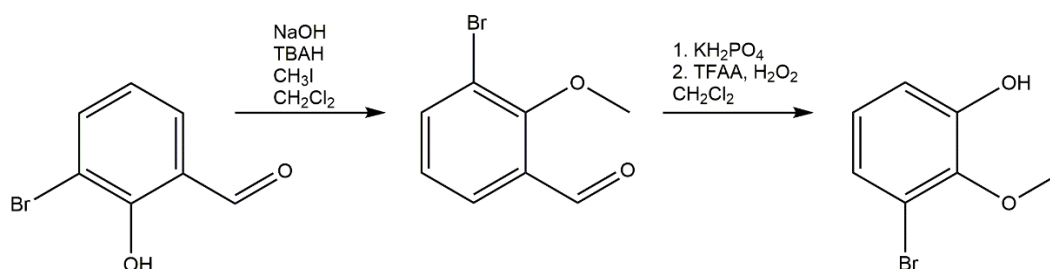

**Figure S2:** General synthetic route leading to 3-bromoguaiacol (entry 7)

### 3-Iodosalicylaldehyde, Figure 3 (Brady et al., 2012)

Under inert gas atmosphere, MgCl<sub>2</sub> (1.73 g, 18 mmol, 2 eq.), trimethylamine (TEA) (2.6 mL, 1.9 g, 19 mmol, 2 eq.), p-formaldehyde (810 mg, 27 mmol, 3 eq.) and 2-iodophenol (2 g, 9 mmol, 1 eq.) were dissolved in 60 mL dry THF. The reaction mixture was stirred under reflux for 16 h. After diluting with 100 mL Et<sub>2</sub>O, the solution was washed three times with 50 mL HCl (2 N), once with 50 mL H<sub>2</sub>O, and 50 mL brine. The organic layer was separated and dried over MgSO<sub>4</sub>. After removal of the solvent under reduced pressure, the residue was twice recrystallized in EtOAc/n-hexane (1/1).

### 3-Iodo-2-methoxybenzaldehyde, Figure 3, according to (Erickson et al., 2012)

NaOH pellets (465 mg, 11.63 mmol, 3.5 eq.) were dissolved in H<sub>2</sub>O (15 mL). Tetrabutylammonium hydroxide solution (15 mL, ~1.5 M or ~40% in H<sub>2</sub>O, ~23 mmol, ~ 6 eq.), CH<sub>2</sub>Cl<sub>2</sub> (30 mL), and 3-iodosalicylaldehyde (855 mg, 3.45 mmol, 1 eq.) were added. Iodomethane (1.1 mL, 2.5 g, 17.67 mmol, 5 eq.) was added dropwise, and the reaction mixture was stirred for 16 h at room temperature afterwards. The aqueous and organic layers were separated, and the aqueous layer was extracted three times with 50 mL CH<sub>2</sub>Cl<sub>2</sub>. The combined organic layers were dried over Na<sub>2</sub>SO<sub>4</sub>, and the solvent was removed under reduced pressure. The residue was purified by column chromatography (Silica gel; n-hexane/ethyl acetate = 5:1).

**3-Iodoguaiacol (3-iodo-2-methoxyphenol, entry 11), Figure 3, according to (Erickson et al., 2012)**

Trifluoroacetic anhydride (2.28 mL, 3.45 g, 16.4 mmol, 8 eq.) was added dropwise to an ice-cold solution of H<sub>2</sub>O<sub>2</sub> solution (364 mg, 30 wt% in H<sub>2</sub>O, 3.21 mmol, 1.6 eq.) and CH<sub>2</sub>Cl<sub>2</sub> (5 mL), and stirred for 1 h at 0 °C. 3-Iodo-2-methoxybenzaldehyde (558 mg, 2.13 mmol, 1 eq.) and potassium dihydrogenphosphate (6 g, 44.1 mmol, 22 eq.) were dissolved in 25 mL CH<sub>2</sub>Cl<sub>2</sub> and cooled to 0 °C. The peroxide-solution was slowly added dropwise to the prepared 3-bromo-methoxybenzaldehyde solution. The reaction mixture was stirred for 2 h at 0°C. To stop the reaction, 10 mL brine and 10 mL 20% sodium bisulfite solution were added. After separation, the aqueous layer was extracted three times with 30 mL CH<sub>2</sub>Cl<sub>2</sub>. The combined organic layers were dried over Na<sub>2</sub>SO<sub>4</sub>, and the solvent was removed under reduced pressure. The residue was taken up in 15 mL MeOH, one drop HCl conc. was added, and the mixture stirred for 15 h at room temperature. After removal of the solvent, the crude product was purified by column chromatography (Silica gel; n-hexane/ethyl acetate = 4:1).

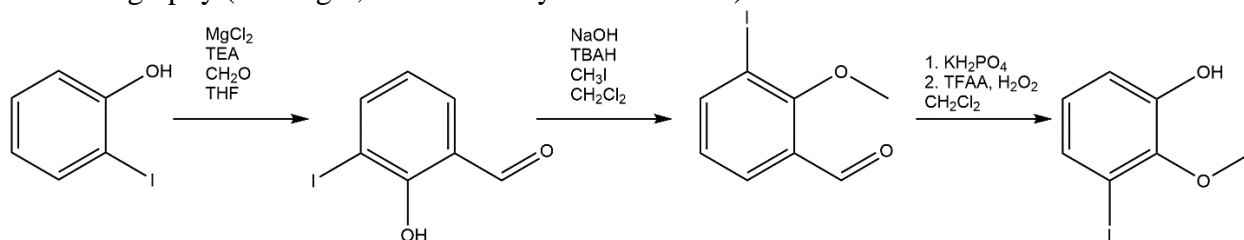

**Figure S3:** General synthetic route leading to 3-iodoguaiacol (entry 11)

**5-Iodo-2-methoxyphenylacetate, Figure 4 (Banwell et al., 2006)**

In a three necked flask equipped with a dropping funnel, 2-methoxyphenyl acetate (1.67 g, 10.05 mmol, 1 eq.) in chloroform (25 mL) maintained at 0 °C under inert gas atmosphere was treated, in one portion, with silver trifluoroacetate (2.89 g, 13.08 mmol, 1.3 eq.). To this mixture a solution of molecular iodine (2.56 g, 10.09 mmol, 1 eq.) in chloroform (62.5 mL) was added dropwise over 1 hour. The mixture was allowed to warm to room temperature during 1 h, stirred for another 4 h, washed with sodium thiosulfate (100 mL of a 20% w/v aqueous solution), and dried over MgSO<sub>4</sub>.

**5-Iodoguaiacol (5-iodo-2-methoxyphenol, entry 13), Figure 4 (Banwell et al., 2006)**

A solution of 5-iodo-2-methoxyphenyl acetate (2.47 g, 8.46 mmol, 1 eq.) in methanol (70 mL) under inert gas atmosphere was treated in one portion with potassium carbonate (5.85 g, 42.33 mmol, 5 eq.). The mixture was stirred at room temperature for 16 h, and filtered through a sintered-glass funnel (once pore 4 and once pore 5). The solvent was removed under reduced pressure and the crude product was purified by column chromatography (Silica gel; n-hexane/ethyl acetate = 3:1).

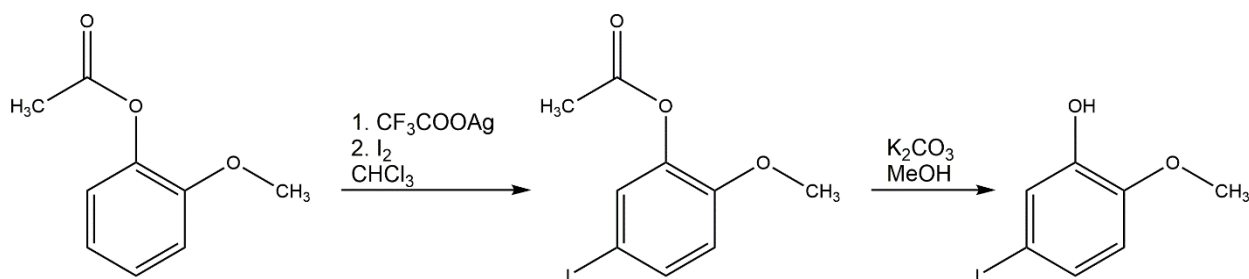

**Figure S4:** General synthetic route leading to 5-iodoguaiacol (entry 13)

**2-(2-methoxyphenoxy)oxane, Figure 5, according to (Weinstabl et al., 2013)**

To a solution of 2 g guaiacol (16.11 mmol, 1 eq.) in  $\text{CH}_2\text{Cl}_2$  (14 mL) 3,4-dihydro-2H-pyran (DHP, 14.6 mL, 161.1 mmol, 10 eq.) and pyridinium *p*-toluenesulfonate (PPTS, 40 mg, 1.61 mmol, 0.1 eq.) were added. The reaction was stirred for 4 h at room temperature. The reaction progress was monitored by TLC. Another 29.2 mL DHP and 80 mg PPTS were added, and the reaction mixture was stirred for another 72 h. Saturated  $\text{NaOH}$  (12 mL) was added to stop the reaction. The mixture was extracted with  $\text{CH}_2\text{Cl}_2$  and the combined organic layers were dried over  $\text{MgSO}_4$ . The solvent was removed under reduced pressure and the crude product was purified by column chromatography (Silica gel; n-hexane/ethyl acetate = 20:1).

**6-Iodoguaiacol (2-iodo-6-methoxyphenol, entry 14), Figure 5 (Weinstabl et al., 2013)**

Under inert gas atmosphere, to a solution of 2-(2-methoxyphenoxy)oxane (1.03 g, 4.95 mmol, 1.0 eq.) in THF (10 mL) *n*-BuLi (2.88 mL, 2.5 M in n-hexane, 7.2 mmol, 1.5 eq) was added slowly at 0 °C. The reaction was allowed to warm to room temperature and stirred under nitrogen atmosphere for 3 h. Subsequently, the mixture was cooled to -50 °C (methanol/liquid nitrogen bath) and iodine (2.44 g, 9.61 mmol, 2.0 eq.) dissolved in THF (15 mL) was added dropwise. After warming to room temperature overnight (16 h stirring) the reaction mixture was concentrated in vacuo and the residue was suspended in water and extracted three times with 30 mL  $\text{CH}_2\text{Cl}_2$ . The combined organic layers were washed with 50 mL saturated  $\text{Na}_2\text{SO}_3$  solution and 50 mL  $\text{H}_2\text{O}$ . After drying over  $\text{MgSO}_4$  and removal of the solvent under reduced pressure, the residue was adsorbed on silica, and purified by column chromatography (Silica gel; n-hexane/ethyl acetate = 3:1).

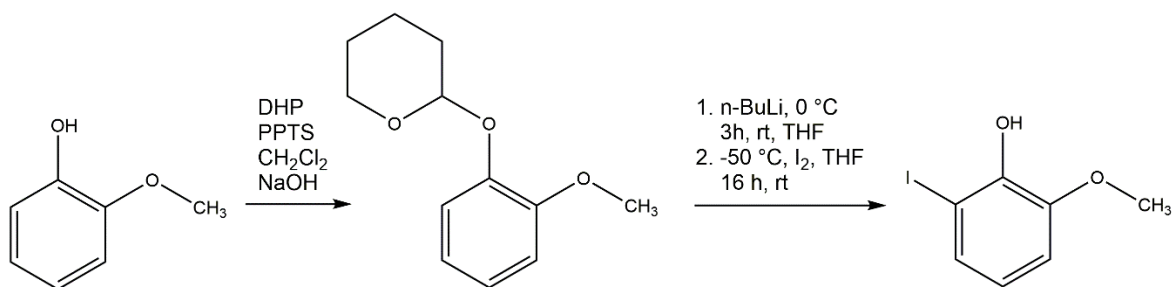

**Figure S5:** General synthetic route leading to 6-iodoguaiacol (entry 14).

# Mass spectra

## 3-Chloroguaiacol (entry 1)

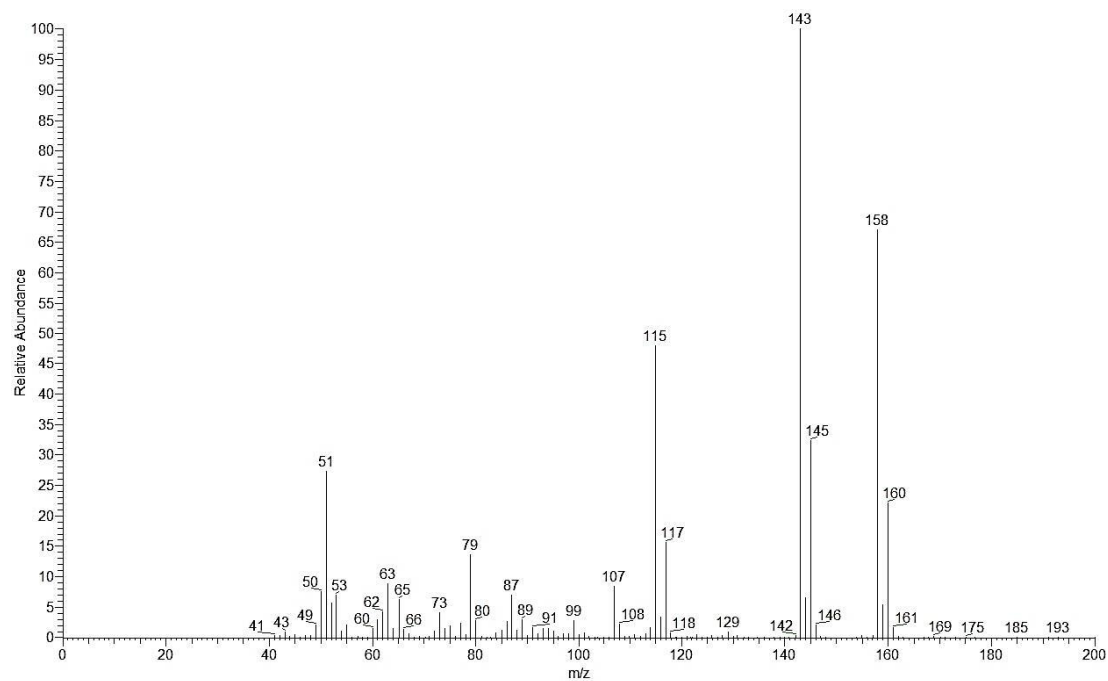

## 3-Bromoguaiacol (entry 7)

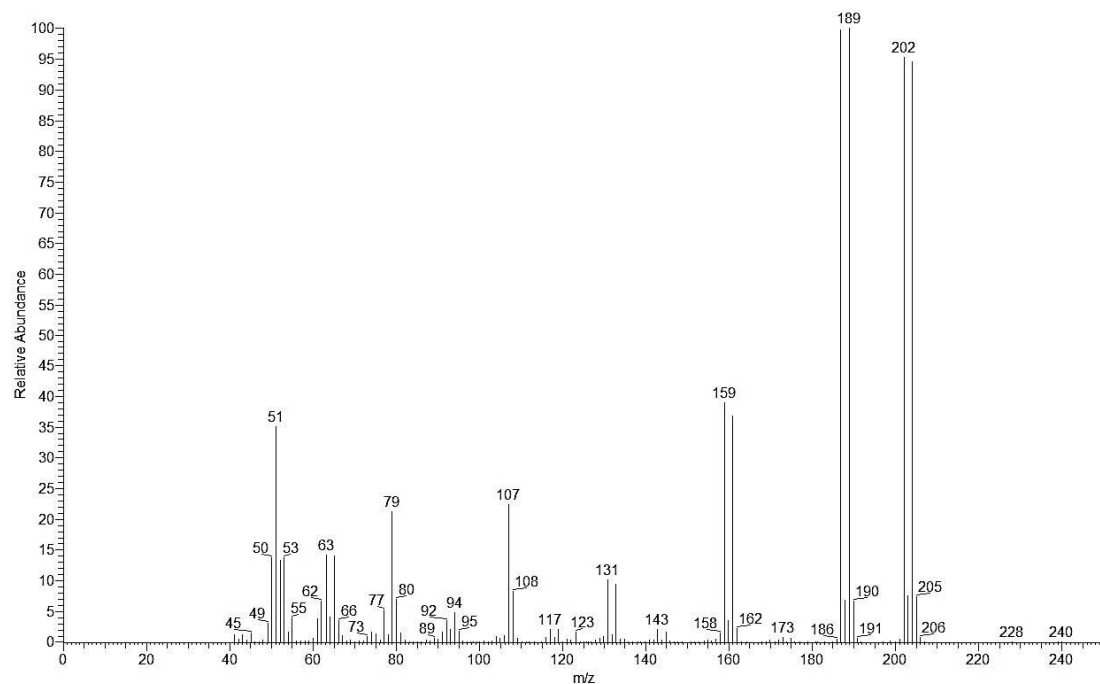

### 3-Iodoguaiacol (entry 11)

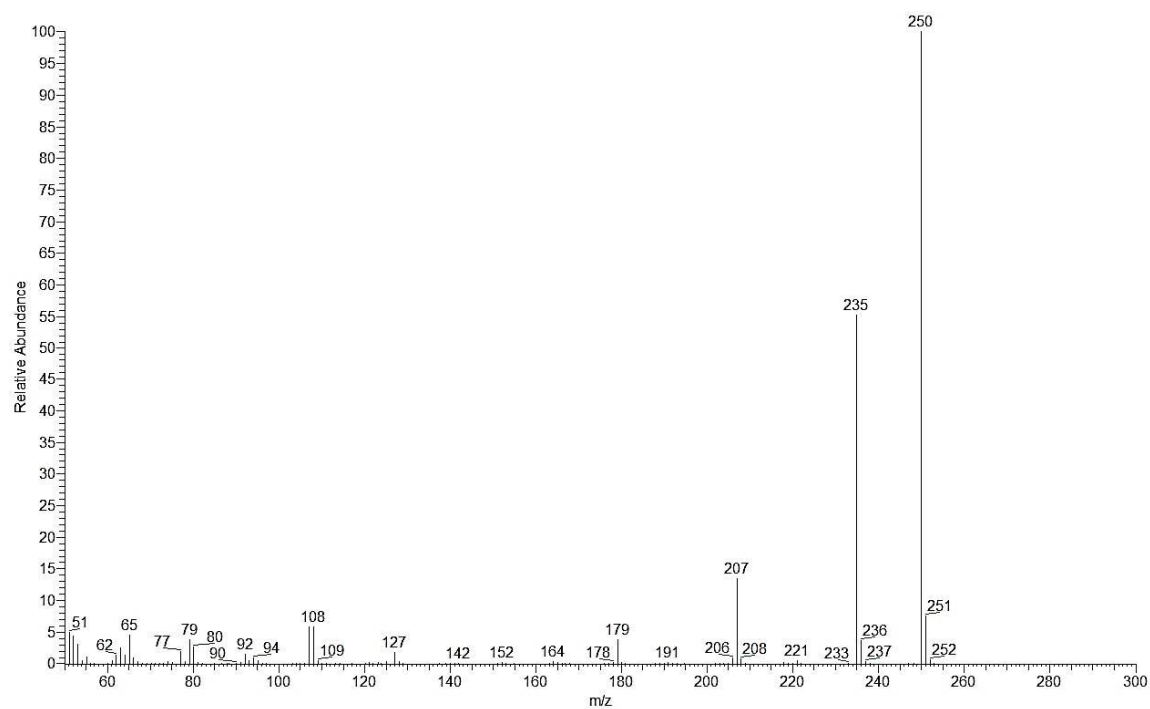

### 5-Iodoguaiacol (entry 13)

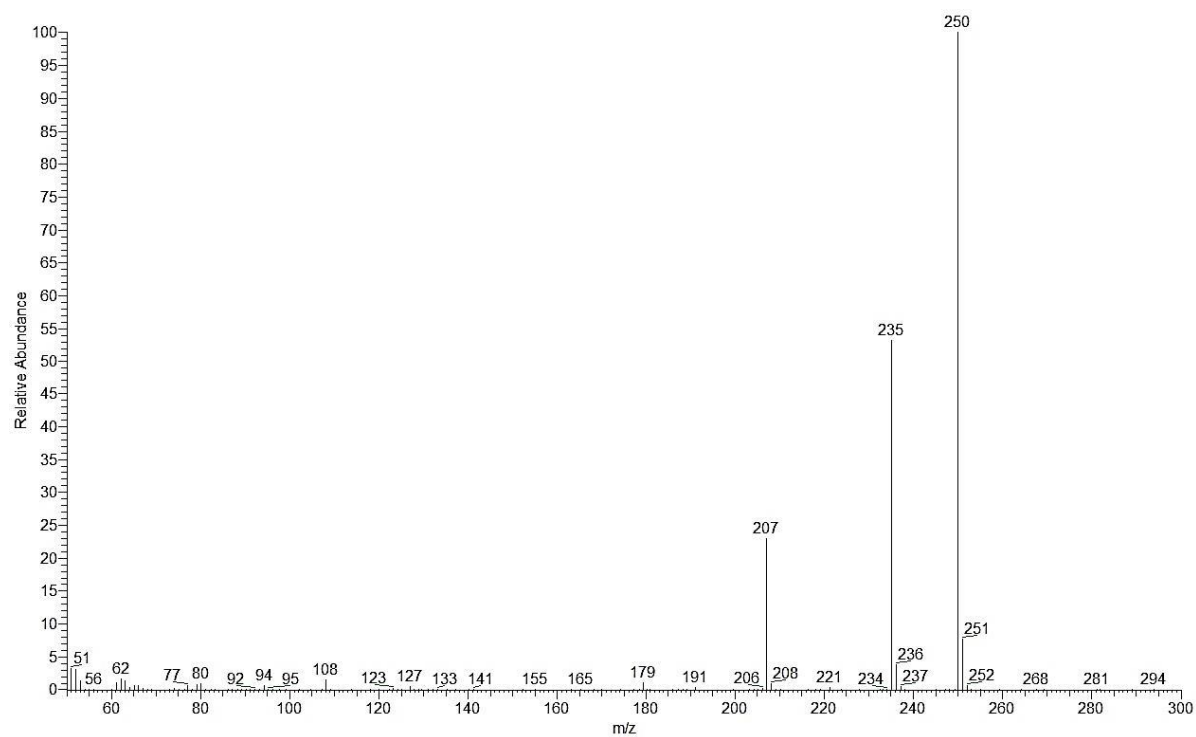

## 6-Iodoguaiacol (entry 14)

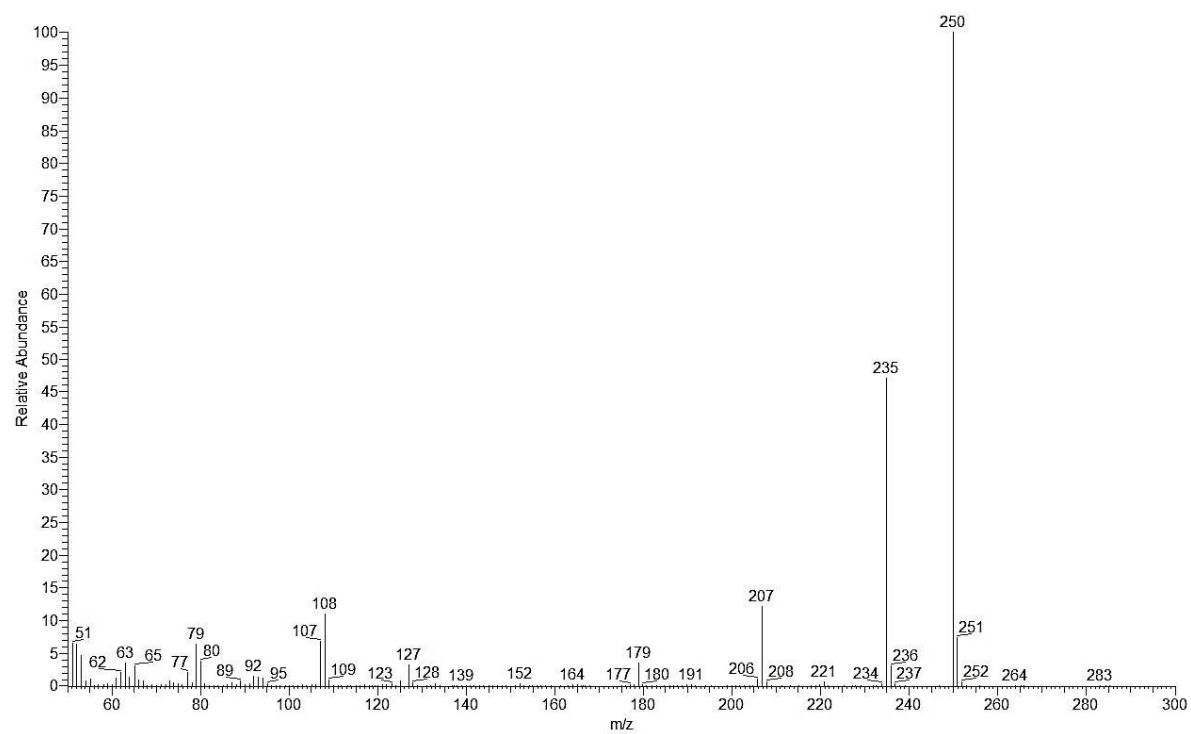



**Table S1.** Removal and degradation approaches of chlorinated guaiacol derivatives reported in literature

| Compound/s                    | Removed or degraded by                                                                                                    |
|-------------------------------|---------------------------------------------------------------------------------------------------------------------------|
| 4-Chloroguaiacol (19.7 %)     | Poly-aluminum chloride as coagulant <sup>a</sup>                                                                          |
| 4,5-dichloroguaiacol (13.5 %) |                                                                                                                           |
| 4-Chloroguaiacol              | Partly oxidized by UV irradiation and hydroxyl radicals                                                                   |
| 4-Chloroguaiacol              | High surface area palm oil shell-activated carbon activated with NaOH <sup>c</sup>                                        |
| 4,5-Dichloroguaiacol          | Peroxidase conjugate of cellulose nanocrystals                                                                            |
| 4,5-Dichloroguaiacol          | Soil microorganisms                                                                                                       |
| 4-Chloroguaiacol              | Metabolized by <i>Acinetobacter junii</i> strain <sup>f</sup>                                                             |
| 5-Chloroguaiacol              |                                                                                                                           |
| 6-Chloroguaiacol              |                                                                                                                           |
| 4,5-Dichloroguaiacol          |                                                                                                                           |
| 5-Chloroguaiacol (100 %)      | Fungal treatment of extraction-stage effluent from chlorine bleaching kraft pulp with <i>Rhizopus oryzae</i> <sup>g</sup> |
| 4,5-Dichloroguaiacol (55 %)   |                                                                                                                           |
| 4-Chloroguaiacol (completely) | Metabolization by <i>Rhodococcus ruber</i> CA16 (soil bacterium) <sup>h</sup>                                             |
| 5-Chloroguaiacol (completely) |                                                                                                                           |
| 6-Chloroguaiacol (completely) |                                                                                                                           |
| 4,5-Dichloroguaiacol (partly) |                                                                                                                           |
| <sup>a</sup>                  | (Choudhary et al., 2015)                                                                                                  |
| <sup>b</sup>                  | (Benitez et al., 2001)                                                                                                    |
| <sup>c</sup>                  | (Hamad et al., 2010)                                                                                                      |
| <sup>d</sup>                  | (Yang et al., 2008)                                                                                                       |
| <sup>e</sup>                  | (González et al., 1995)                                                                                                   |
| <sup>f</sup>                  | (González et al., 1993)                                                                                                   |
| <sup>g</sup>                  | (Nagarathnamma and Bajpai, 1999)                                                                                          |
| <sup>h</sup>                  | (Acevedo et al., 1995)                                                                                                    |

**Table S2.** Odor qualities of all investigated halogenated guaiacol derivatives as reported by all 5 panelists

| Entry | Odorant              | P 1                 | P 2                        | P 3                                    | P 4                                         | P 5                                     |
|-------|----------------------|---------------------|----------------------------|----------------------------------------|---------------------------------------------|-----------------------------------------|
| 1     | 3-Chloroguaiacol     | smoky               | musty, smoky               | medical                                | smoky, medical                              | plastic-, vanilla-like                  |
| 2     | 4-Chloroguaiacol     | sweet, vanilla-like | whiskey-like, sweet        | vanilla-like, sweet, smoky             | sweet, vanilla-, marshmallow-like           | sweet, vanilla-like                     |
| 3     | 5-Chloroguaiacol     | ham-like, smoked    | sweet, smoky               | smoky, clove-like                      | smoked, medical                             | smoked, ham-like                        |
| 4     | 6-Chloroguaiacol     | smoky, sweet        | smoky, sweet, vanilla-like | vanilla-like, smoky, sweet, clove-like | smoky, ham-, pool-, plaster-like, medicinal | artificial, plastic-, ham-like, pungent |
| 5     | 4,5-Dichloroguaiacol | smoky, sweet        | sweet, smoky               | smoky, clove-, vanilla-like            | sweet, vanilla-like                         | clove-, vanilla-like                    |
| 6     | 5,6-Dichloroguaiacol | smoky               | vanilla-, plaster-like     | smoky                                  | medical, plaster-like                       | medical, plastic-like                   |
| 7     | 3-Bromoguaiacol      | medical             | musty, old                 | musty                                  | old                                         | plastic-like, sweet                     |
| 8     | 4-Bromoguaiacol      | smoky, sweet        | sweet, smoky, fruity       | sweet, vanilla-like, musty             | vanilla-like                                | vanilla-like                            |
| 9     | 5-Bromoguaiacol      | smoked              | sweet, smoky, plaster-like | smoky, clove-like                      | sweet, smoky, medical                       | smoky, vanilla-like, sweet              |
| 10    | 6-Bromoguaiacol      | musty, smoky        | smoky, plaster-like        | plaster-, plastic-like, burnt          | medical, plaster-like                       | medical, plastic-like                   |
| 11    | 3-Iodoguaiacol       | smoky, burnt        | musty, moldy               | musty                                  | musty                                       | musty, moldy                            |
| 12    | 4-Iodoguaiacol       | smoky               | smoky, vanilla-like        | vanilla-, clove-like, smoky            | sweet, vanilla-like                         | vanilla-like, sweet                     |
| 13    | 5-Iodoguaiacol       | smoked, sweet       | sweet, vanilla-like        | clove-like, sweet                      | smoked, sweet                               | sweet, chewing gum-like, smoked         |
| 14    | 6-Iodoguaiacol       | smoked              | smoky                      | n.p.                                   | medical, plaster-like                       | medical, plastic-like                   |

n.p.: Panelist was unable to perceive the odorant.

**Table S3:** Entry numbers, trivial and IUPAC names, structures and concentrations of FD1 solutions and IST (internal standard) in µg/mL.

| Entry | Trivial name         | IUPAC name                   | Structure                                                                            | FD1 Conc.<br>[µg/mL] | IST Conc.<br>[µg/mL] |
|-------|----------------------|------------------------------|--------------------------------------------------------------------------------------|----------------------|----------------------|
| 1     | 3-Chloroguaiacol     | 3-chloro-2-methoxyphenol     | 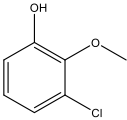    | 11.80                | 11.17                |
| 2     | 4-Chloroguaiacol     | 4-chloro-2-methoxyphenol     |     | 11.51                | 11.17                |
| 3     | 5-Chloroguaiacol     | 5-chloro-2-methoxyphenol     |    | 12.22                | 11.17                |
| 4     | 6-Chloroguaiacol     | 2-chloro-6-methoxyphenol     |    | 4.96                 | 10.44                |
| 5     | 4,5-Dichloroguaiacol | 4,5-dichloro-2-methoxyphenol |   | 10.56                | 11.17                |
| 6     | 5,6-Dichloroguaiacol | 2,3-dichloro-6-methoxyphenol |  | 14.48                | 11.17                |
| 7     | 3-Bromoguaiacol      | 3-bromo-2-methoxyphenol      |   | 11.04                | 11.17                |
| 8     | 4-Bromoguaiacol      | 4-bromo-2-methoxyphenol      |   | 15.52                | 11.17                |
| 9     | 5-Bromoguaiacol      | 5-bromo-2-methoxyphenol      |  | 9.64                 | 11.17                |
| 10    | 6-Bromoguaiacol      | 2-bromo-6-methoxyphenol      |  | 9.77                 | 11.17                |

**Table S3:** Entry numbers, trivial and IUPAC names, structures and concentrations of FD1 solutions and IST (internal standard) in  $\mu\text{g/mL}$ , continued.

| Entry | Trivial name   | IUPAC name             | Structure                                                                          | FD1 Conc.<br>[ $\mu\text{g/mL}$ ] | IST Conc.<br>[ $\mu\text{g/mL}$ ] |
|-------|----------------|------------------------|------------------------------------------------------------------------------------|-----------------------------------|-----------------------------------|
| 11    | 3-Iodoguaiacol | 3-iodo-2-methoxyphenol | 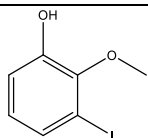  | 11.85                             | 11.17                             |
| 12    | 4-Iodoguaiacol | 4-iodo-2-methoxyphenol |   | 8.38                              | 11.17                             |
| 13    | 5-Iodoguaiacol | 5-iodo-2-methoxyphenol |  | 10.23                             | 11.17                             |
| 14    | 6-Iodoguaiacol | 2-iodo-6-methoxyphenol |  | 9.66                              | 11.17                             |

**Figure S6:** Determined odor thresholds for all investigated halogenated guaiacol derivatives, individual values of all panelists

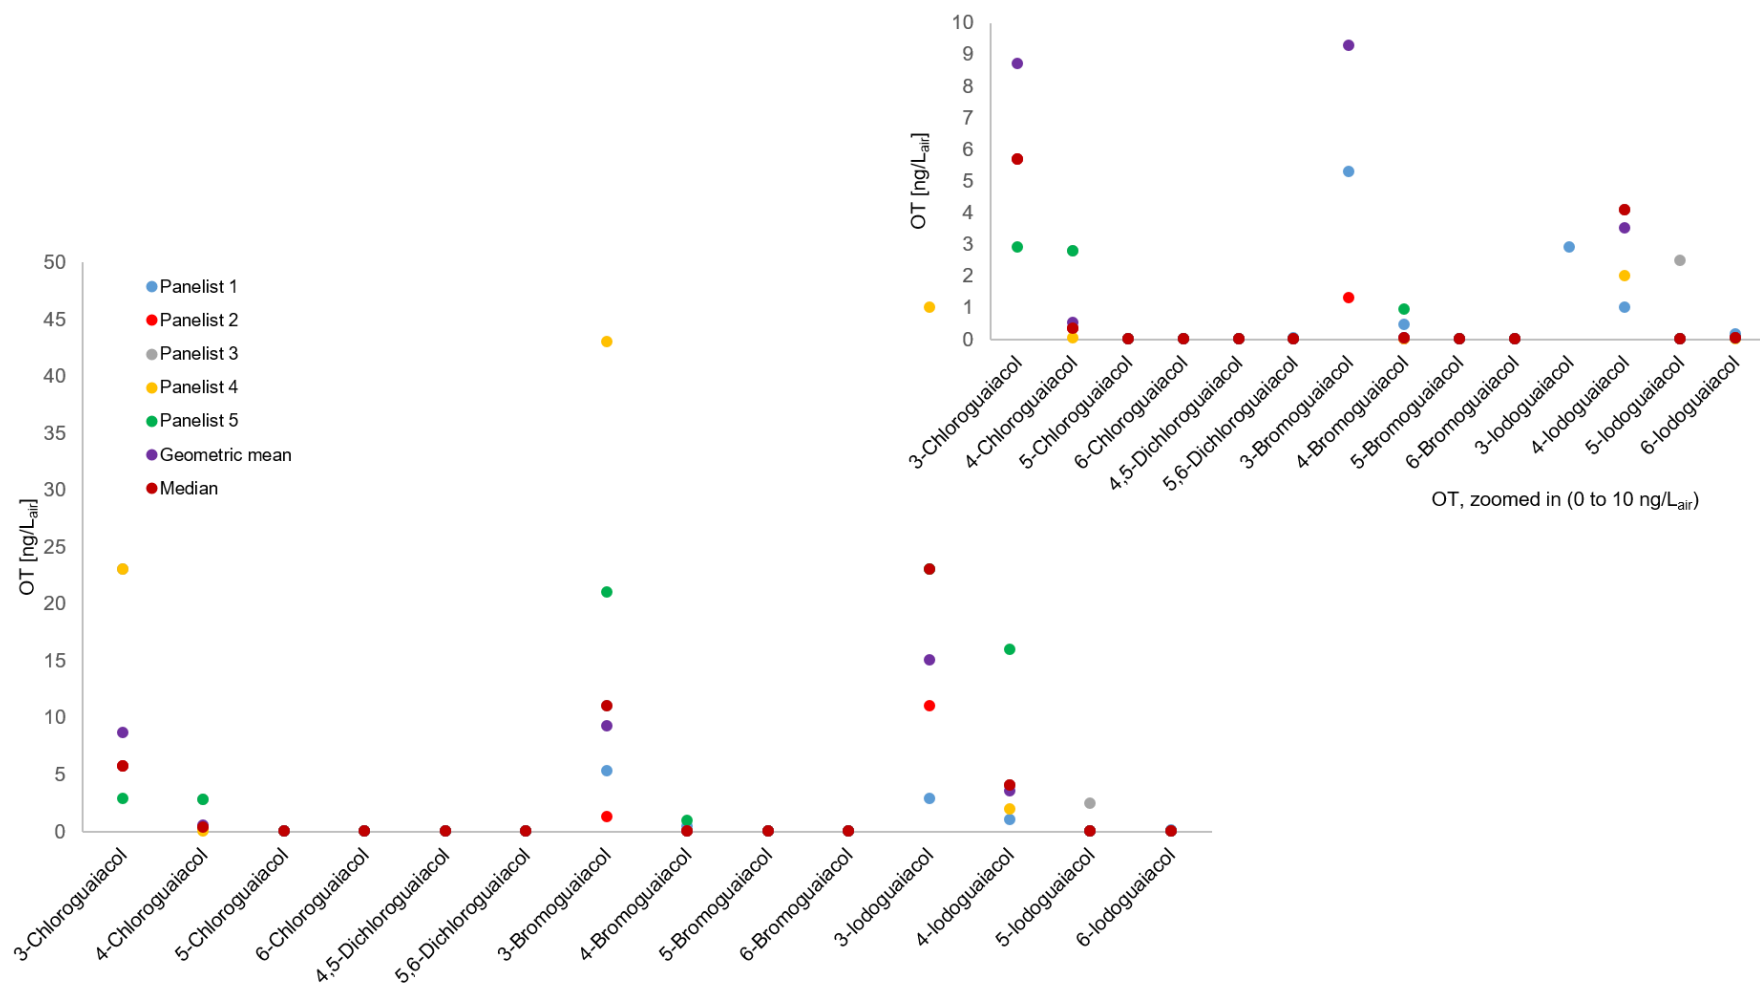

**Figure S7:** Determined odor thresholds for all investigated halogenated guaiacol derivatives, individual values of all panelists, logarithmic scale

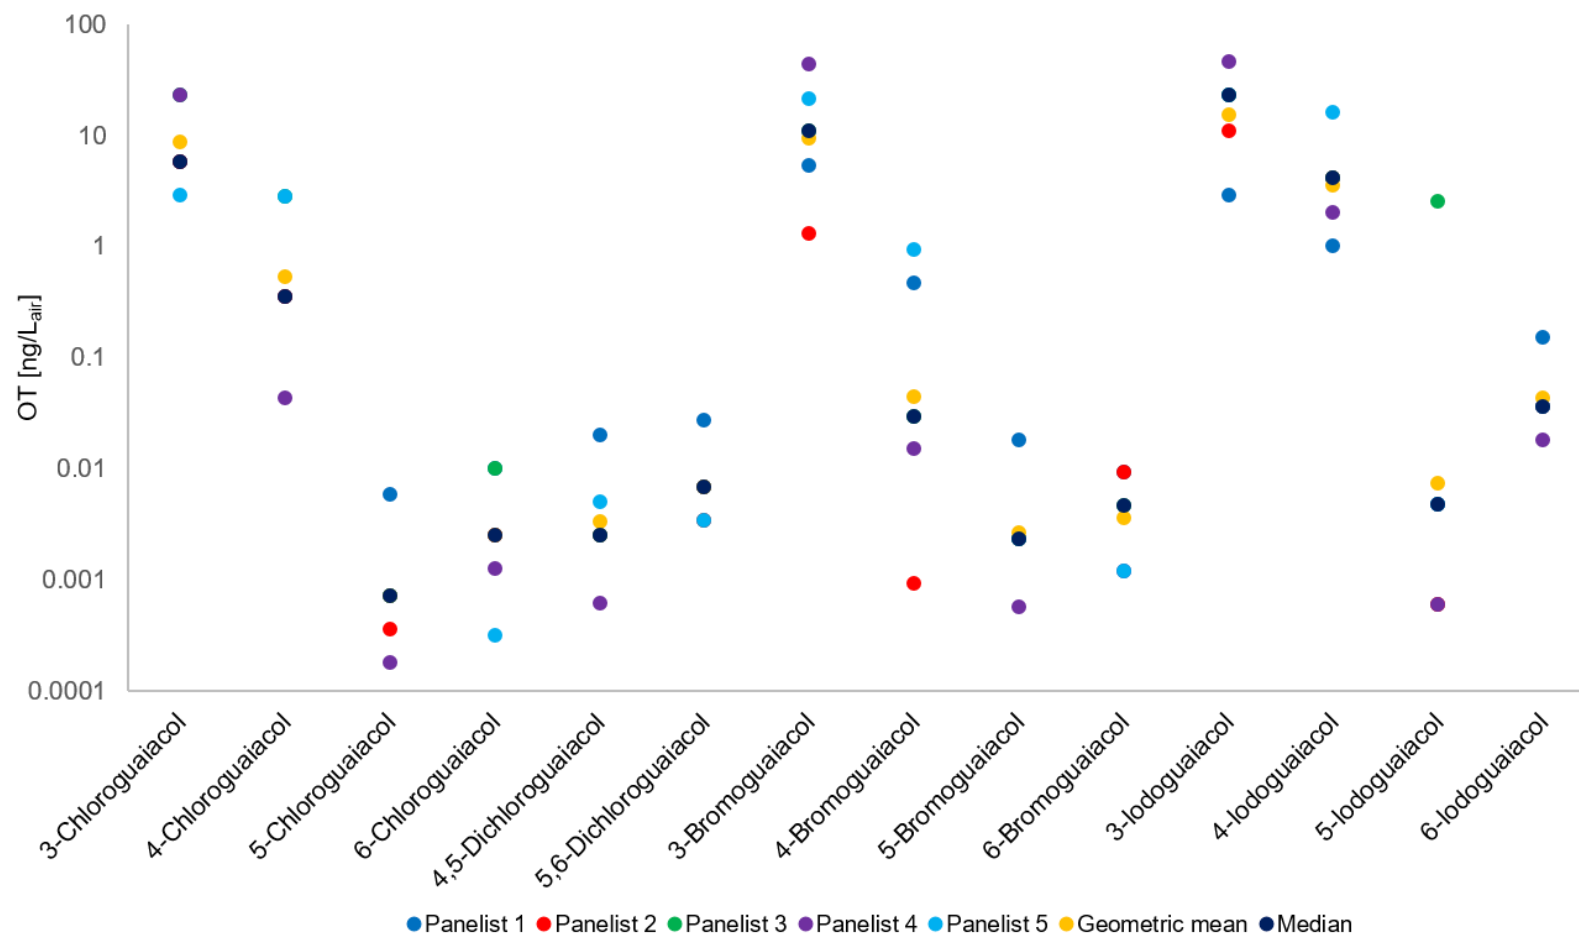

**Figure S8:** Boxplot of the odor thresholds for all investigated halogenated guaiacol derivatives (5 panelists, two males, three females), logarithmic scale. Mean value ( $\pm$  SD), markers at minimum and maximum OT, box perc. 25-75%.

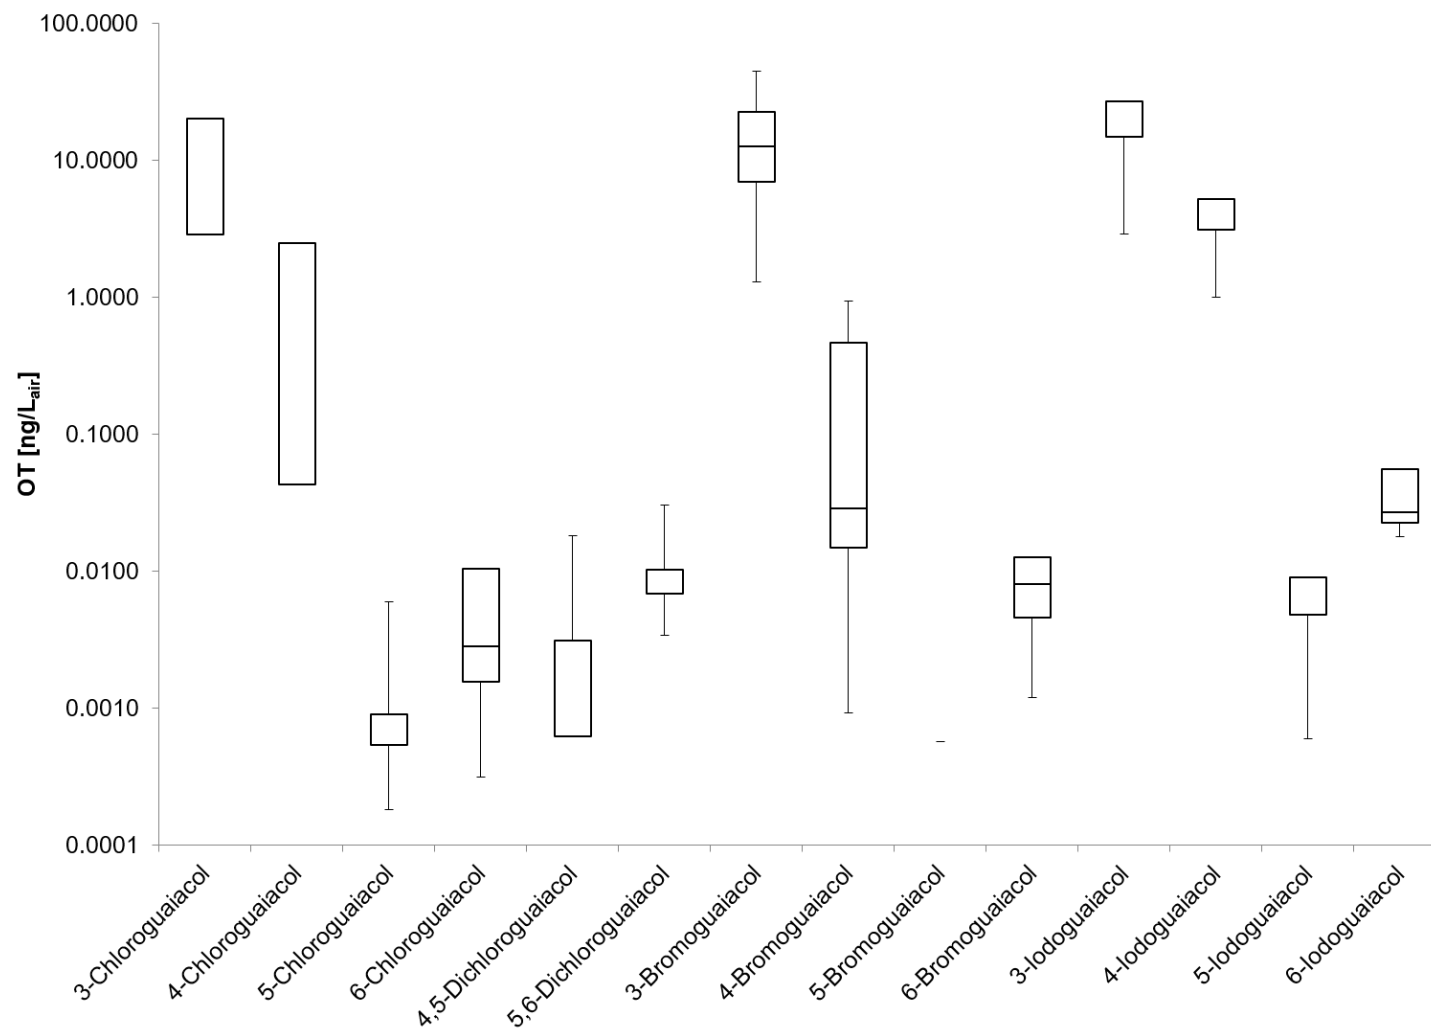

- Acevedo, C., Brezny, R., Joyce, T.W., and González, B. (1995). Metabolism of mono- and dichlorinated guaiacols by *Rhodococcus ruber* CA16. *Current Microbiology* 30, 63-67.
- Banwell, M.G., Hamel, E., Hockless, D.C.R., Verdier-Pinard, P., Willis, A.C., and Wong, D.J. (2006). 4,5-Diaryl-1H-pyrrole-2-carboxylates as combretastatin A-4/lamellarin T hybrids: Synthesis and evaluation as anti-mitotic and cytotoxic agents. *Bioorganic & Medicinal Chemistry* 14, 4627-4638.
- Benitez, F.J., Beltran-Heredia, J., Acero, J.L., and Rubio, F.J. (2001). Oxidation of several chlorophenolic derivatives by UV irradiation and hydroxyl radicals. *Journal of Chemical Technology & Biotechnology* 76, 312-320.
- Brady, R.M., Hatzis, E., Connor, T., Street, I.P., Baell, J.B., and Lessene, G. (2012). Synthesis of conformationally constrained benzoylureas as BH3-mimetics. *Organic & Biomolecular Chemistry* 10, 5230-5237.
- Choudhary, A.K., Kumar, S., and Sharma, C. (2015). Removal of chloro-organics and color from pulp and paper mill wastewater by polyaluminium chloride as coagulant. *Desalination and Water Treatment* 53, 697-708.
- Erickson, P.R., Grandbois, M., Arnold, W.A., and McNeill, K. (2012). Photochemical Formation of Brominated Dioxins and Other Products of Concern from Hydroxylated Polybrominated Diphenyl Ethers (OH-PBDEs). *Environmental Science & Technology* 46, 8174-8180.
- González, B., Acevedo, C., Brezny, R., and Joyce, T. (1993). Metabolism of chlorinated guaiacols by a guaiacol-degrading *Acinetobacter junii* strain. *Applied and Environmental Microbiology* 59, 3424-3429.
- González, B., Brezny, R., Herrera, M., and Joyce, T.W. (1995). Degradation of 4,5-dichloroguaiacol by soil microorganisms. *World Journal of Microbiology and Biotechnology* 11, 536-540.
- Hamad, B.K., Noor, A.M., Afida, A.R., and Mohd Asri, M.N. (2010). High removal of 4-chloroguaiacol by high surface area of oil palm shell-activated carbon activated with NaOH from aqueous solution. *Desalination* 257, 1-7.
- Nagarathnamma, R., and Bajpai, P. (1999). Decolorization and Detoxification of Extraction-Stage Effluent from Chlorine Bleaching of Kraft Pulp by *Rhizopus oryzae*. *Applied and Environmental Microbiology* 65, 1078-1082.
- Steen, P.O., Grandbois, M., McNeill, K., and Arnold, W.A. (2009). Photochemical Formation of Halogenated Dioxins from Hydroxylated Polybrominated Diphenyl Ethers (OH-PBDEs) and Chlorinated Derivatives (OH-PBCDEs). *Environmental Science & Technology* 43, 4405-4411.
- Weinstabl, H., Suhartono, M., Qureshi, Z., and Lautens, M. (2013). Total Synthesis of (+)-Linnoxepin by Utilizing the Catellani Reaction. *Angewandte Chemie International Edition* 52, 5305-5308.
- Yang, R., Tan, H., Wei, F., and Wang, S. (2008). Peroxidase conjugate of cellulose nanocrystals for the removal of chlorinated phenolic compounds in aqueous solution. *Biotechnology (Faisalabad, Pak.)* 7, 233-241.
